# Supplementary material for: Electrical Transport in Iron Phosphate-Based Glass-(Ceramics): Insights into the Role of B2O3 and HfO2 from Model-Free Scaling Procedures
Source: MDPI journal article supplement (doi:10.3390/nano12040639), 2022-02-14
Supplement: s1 [file s1]

# Electrical Transport in Iron Phosphate-Based Glass-(Ceramics): Insights into the Role of B<sub>2</sub>O<sub>3</sub> and HfO<sub>2</sub> from Model-Free Scaling Procedures

Arijeta Bafti <sup>1</sup>, Shiro Kubuki <sup>2</sup>, Hüseyin Ertap <sup>3</sup>, Mustafa Yüksek <sup>4</sup>, Mevlüt Karabulut <sup>5</sup>, Andrea Moguš-Milanković <sup>6</sup> and Luka Pavić <sup>6,\*</sup>

- <sup>1</sup> Faculty of Chemical Engineering and Technology, University of Zagreb, Marulićev trg 19, Zagreb 10000, Croatia; abafti@fkit.hr
- <sup>2</sup> Department of Chemistry, Graduate School of Science, Tokyo Metropolitan University, 1-1, Minami-Osawa, Hachi-Oji, Tokyo 192-0397, Japan; kubuki@tmu.ac.jp
- <sup>3</sup> Department of Physics, Kafkas University, Kars 36100, Turkey; huseyinertap@kafkas.edu.tr
- <sup>4</sup> Electrical & Electronics Department, Faculty of Engineering and Natural Sciences, İskenderun Technical University, İskenderun 31200, Turkey; mustafa.yukse@iste.edu.tr
- <sup>5</sup> Department of Physics, Gebze Technical University, Gebze 41400, Turkey; mevlutk@gtu.edu.tr
- <sup>6</sup> Ruđer Bošković Institute, 10000 Zagreb, Croatia; mogus@irb.hr
- \* Correspondence: lpavic@irb.hr

## Mössbauer spectroscopy

**Citation:** Bafti, A.; Kubuki, S.; Ertap, H.; Yüksek, M.; Karabulut, M.; Moguš-Milanković, A.; Pavić, L. Electrical Transport in Iron Phosphate-Based Glass-(Ceramics): Insights into the Role of B<sub>2</sub>O<sub>3</sub> and HfO<sub>2</sub> from Model-Free Scaling Procedures. *Nanomaterials* **2022**, *12*, 639. <https://doi.org/10.3390/nano12040639>

Academic Editors: Xiang-Hua Zhang and Lothar Wondraczek

Received: 2 December 2021

Accepted: 11 February 2022

Published: 14 February 2022

**Publisher's Note:** MDPI stays neutral with regard to jurisdictional claims in published maps and institutional affiliations.

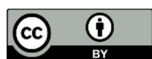

**Copyright:** © 2022 by the authors. Licensee MDPI, Basel, Switzerland. This article is an open access article distributed under the terms and conditions of the Creative Commons Attribution (CC BY) license (<https://creativecommons.org/licenses/by/4.0/>).

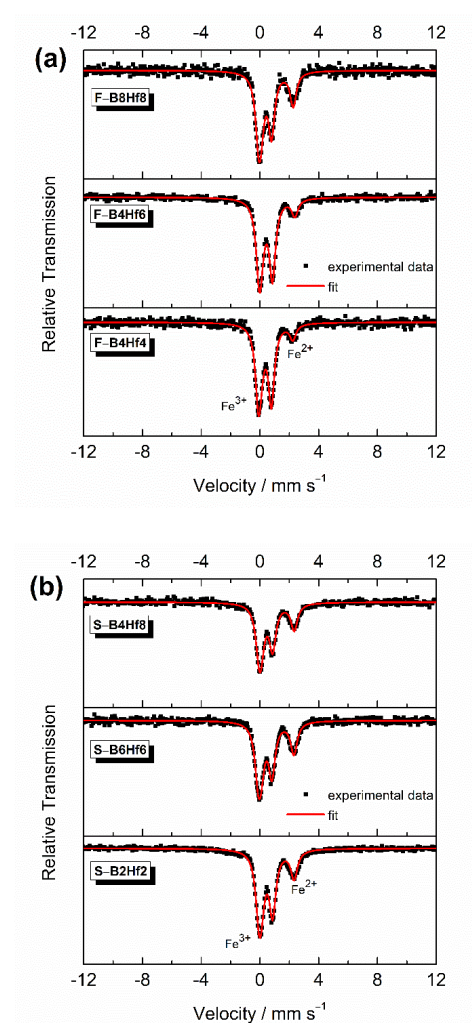

**Figure S1.** Mössbauer spectra of selected glass-(ceramics) samples from (a) F– and (b) S–series.

## Impedance spectroscopy

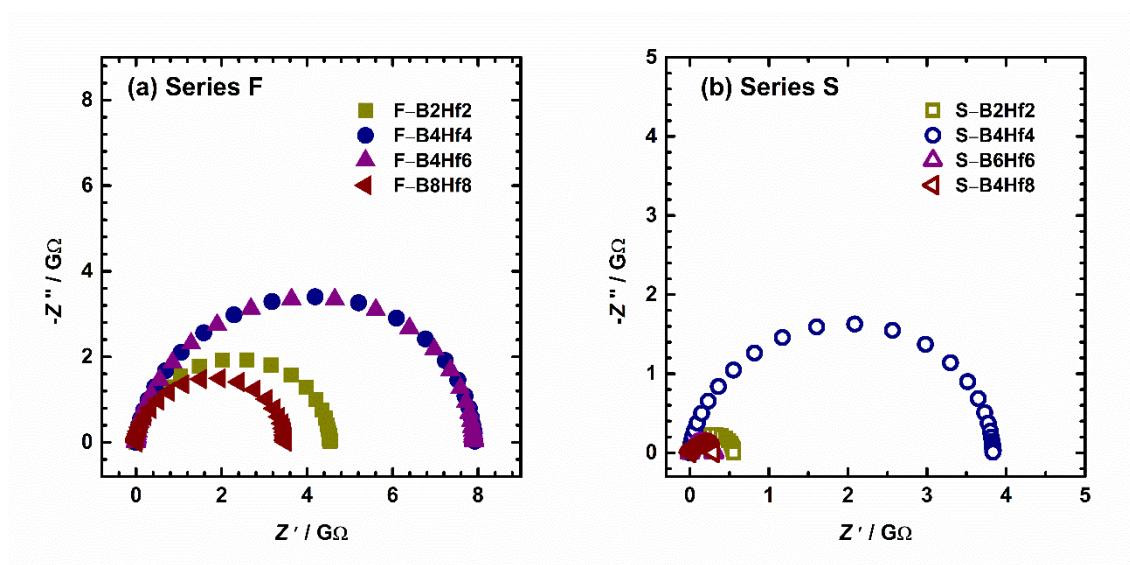

**Figure S2.** Complex impedance plots @30 °C for all studied glass-(ceramic) samples from (a) F- and (b) S-series.
